# Supplementary material for: Lung cDC1 and cDC2 dendritic cells priming naive CD8+ T cells in situ prior to migration to draining lymph nodes
Source: PubMed Central journal article supplement — Cell Rep. Author manuscript; Available in PMC 2023 Nov 26. (PMC10676754; doi:10.1016/j.celrep.2023.113299), 2023-10-31
Supplement: NIHMS1941908-supplement-1.pdf [file NIHMS1941908-supplement-1.pdf]

Cell Reports, Volume 42

**Supplemental information**

**Lung cDC1 and cDC2 dendritic cells priming naive**

**CD8<sup>+</sup> T cells *in situ* prior to migration**

**to draining lymph nodes**

**Youhui Si, Yihan Wang, Qiaomu Tian, Qiang Wang, Jared M. Pollard, Pramod K. Srivastava, Aaron P. Esser-Kahn, Joel H. Collier, Anne I. Sperling, and Anita S. Chong**

## Supplementary Materials

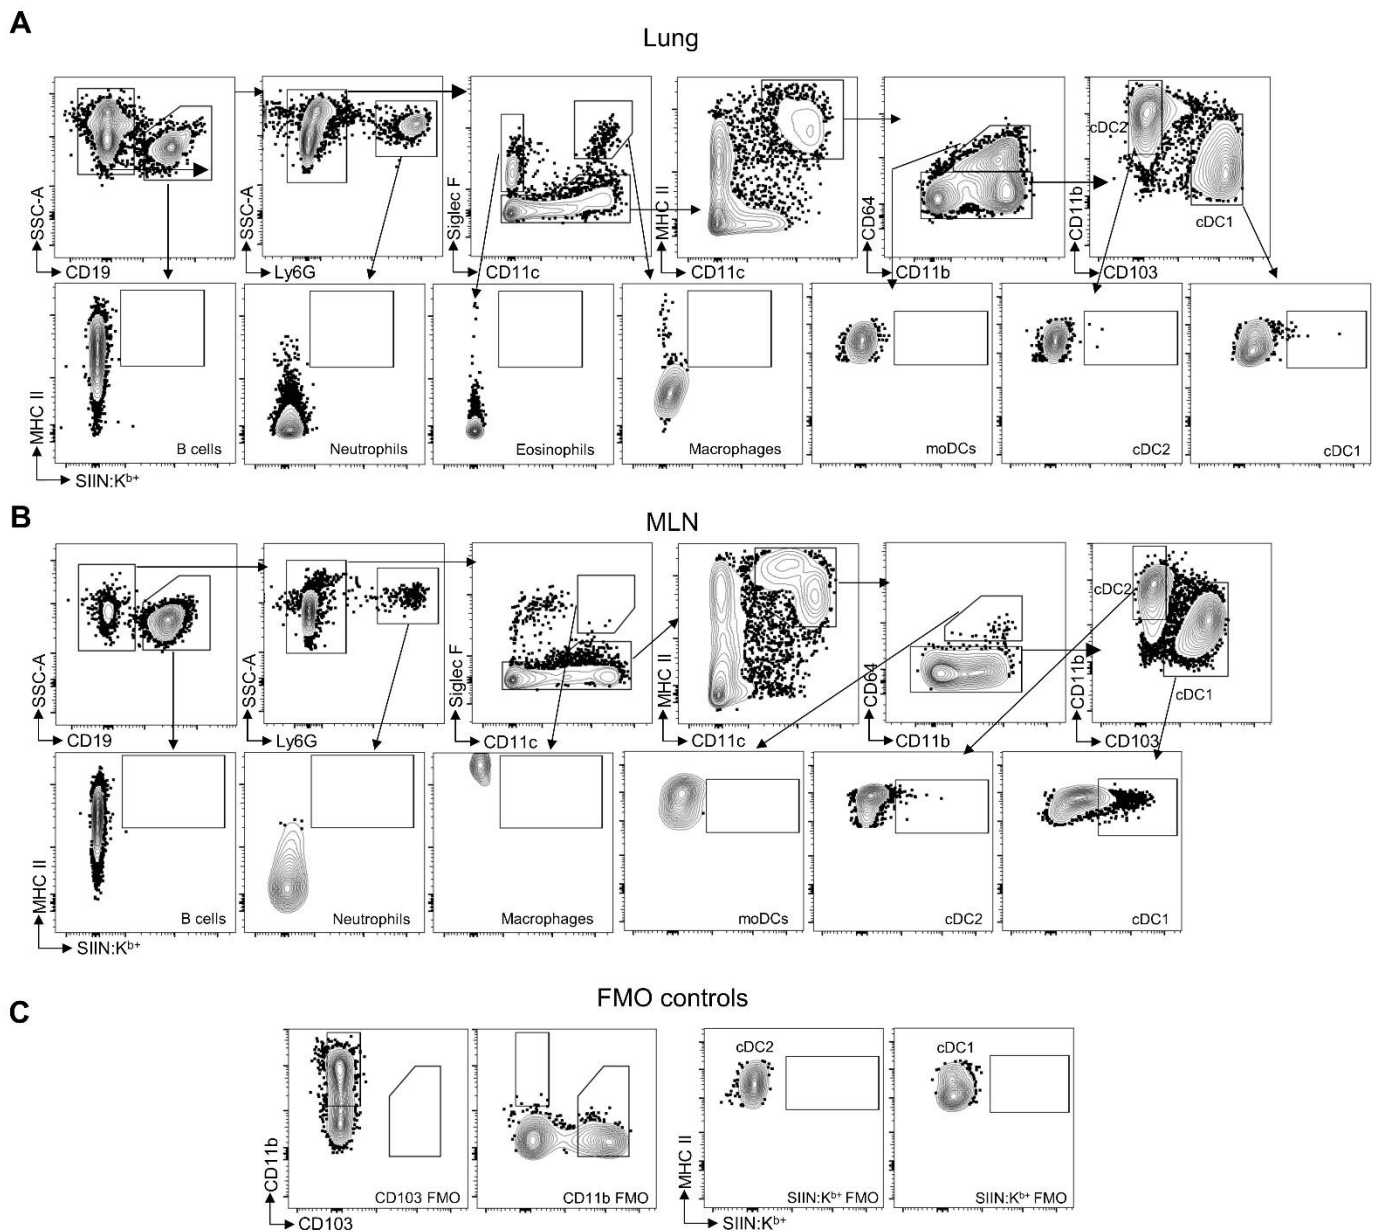

**Fig. S1. Gating strategy for SIINFEKL:Kb-presenting cells in lung and mediastinal draining lymph nodes (MLN) after intranasal SIIN-Q11. Related to Figure 3 and 4. Gating strategy to identify SIINFEKL:Kb-presenting cells in lung (A) and MLN (B), FMO controls (C).**

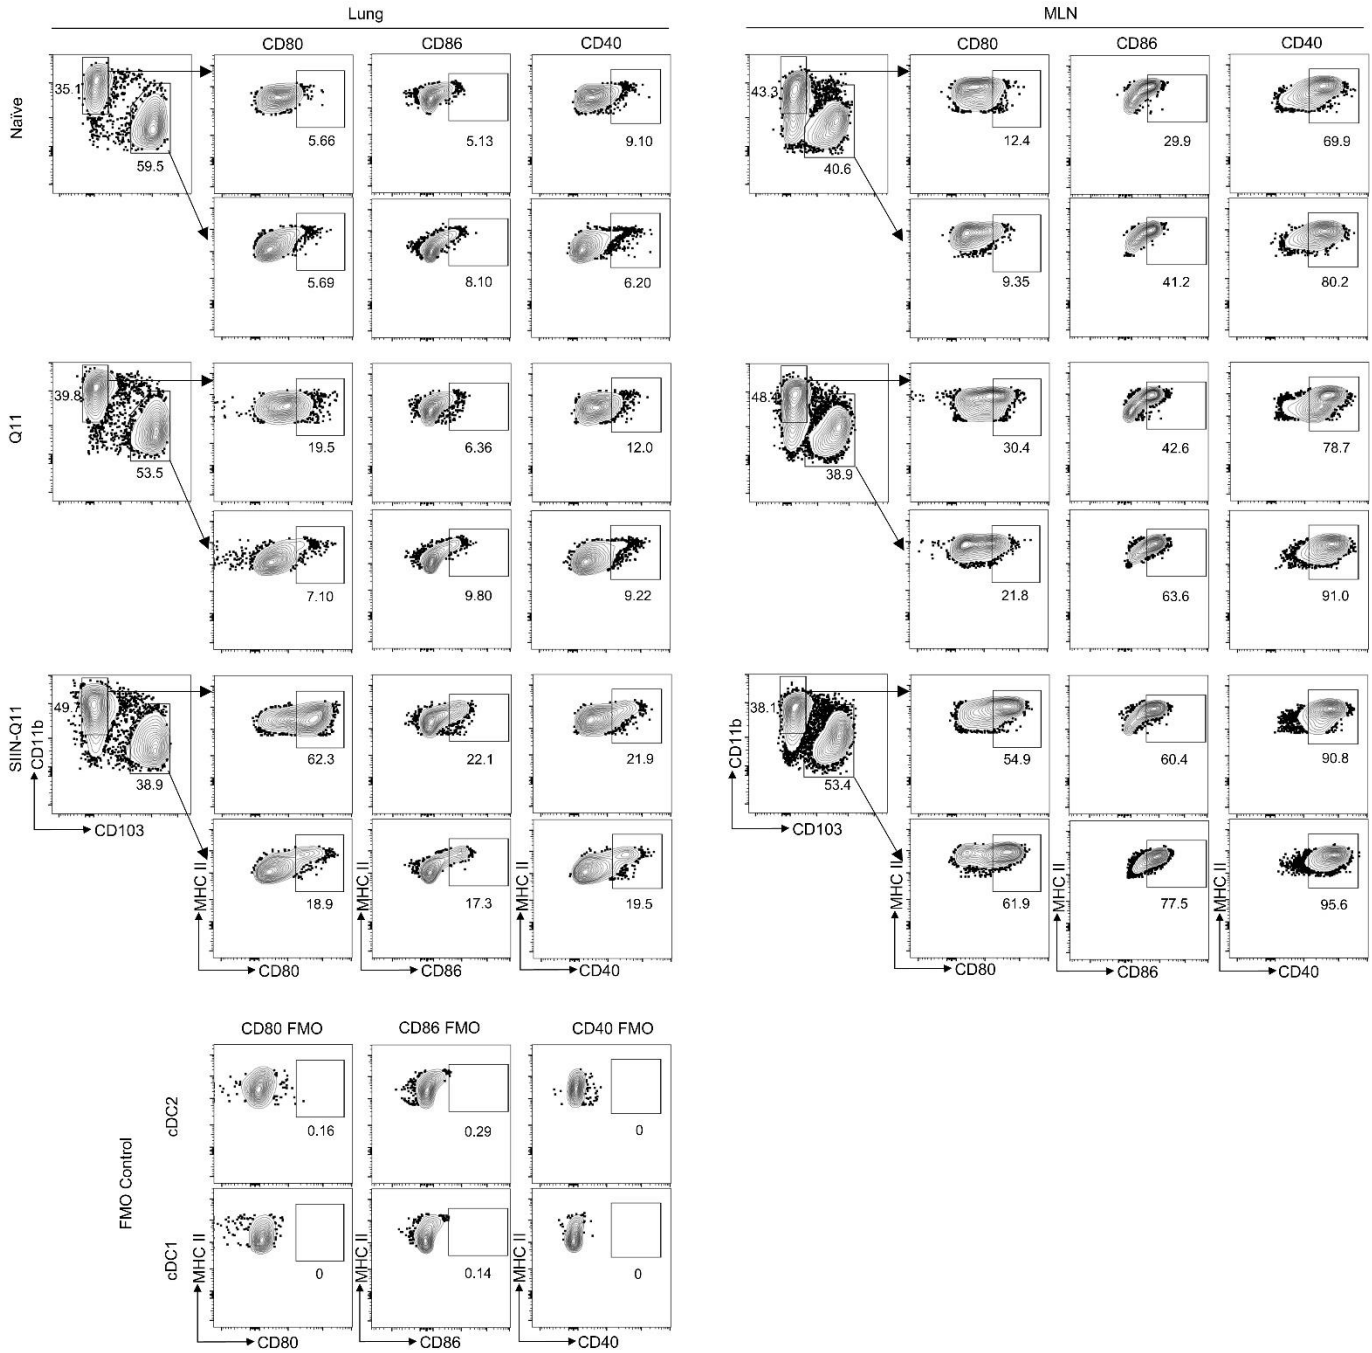

**Fig. S2. Representative flow plots of CD80, CD86 and CD40 in lung and MLN after intranasal SIIN-Q11. Related to Figure 3 and 4.**

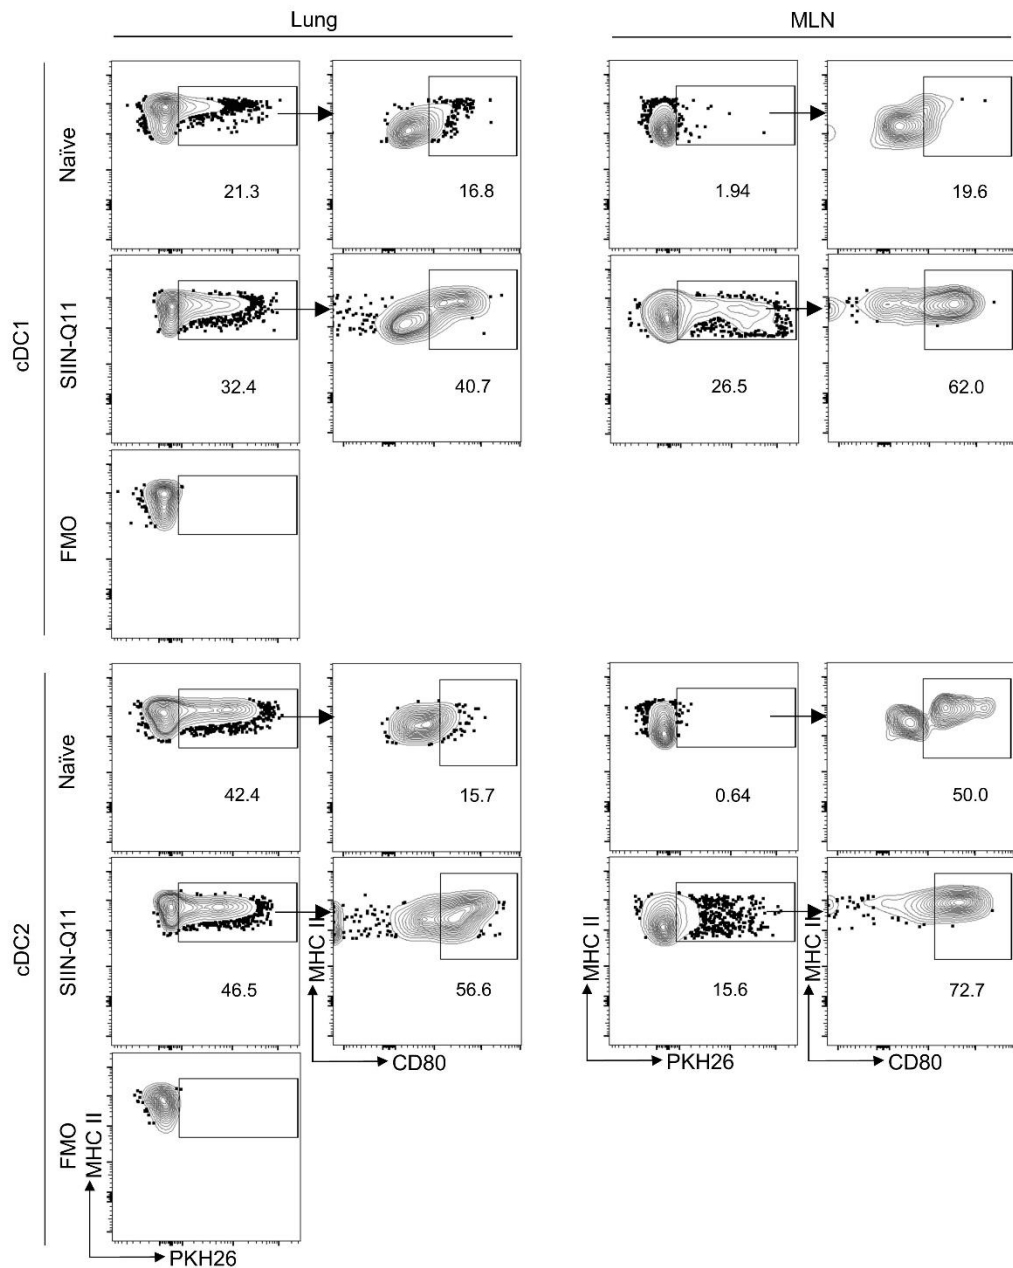

**Fig. S3. Representative flow plots of PKH+ DCs and CD80 expression in lung and MLN after intranasal SIIN-Q11. Related to Figure 4.**

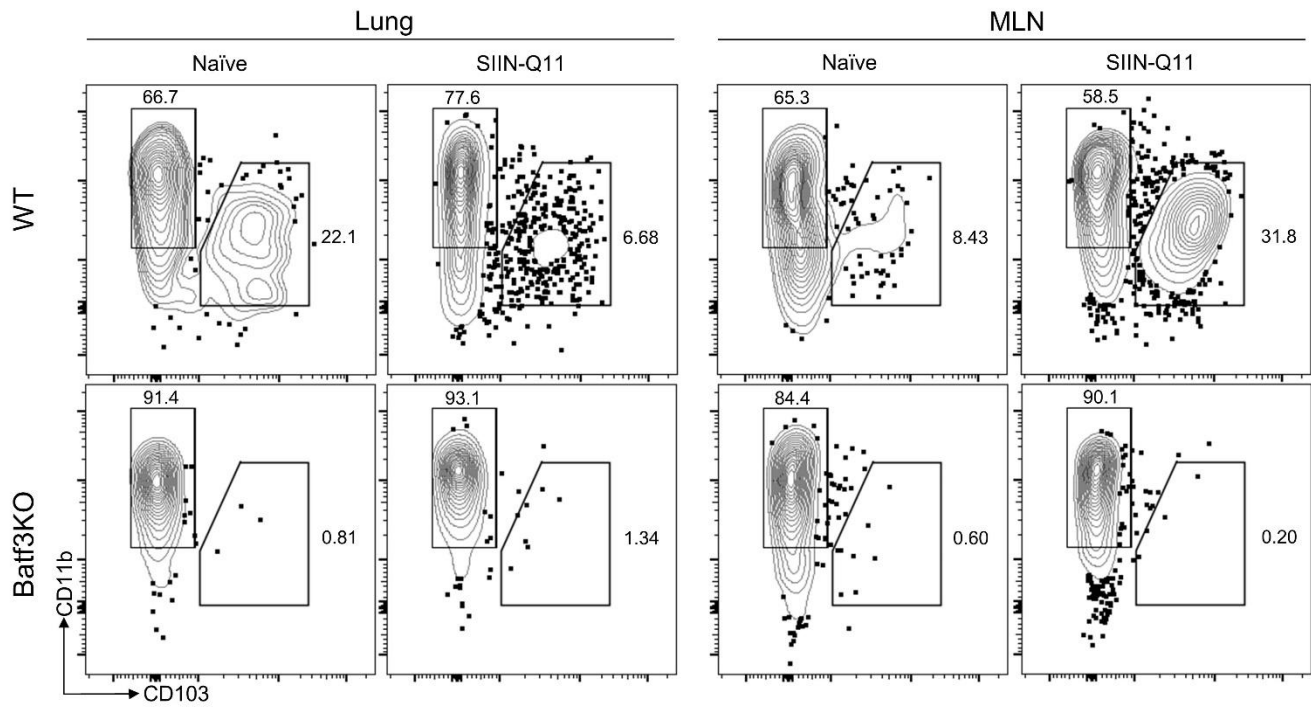

**Fig. S4. Verification the absence of cDC1 in Batf3KO mice at baseline and following SIIN-Q11. Related to Figure 6.**

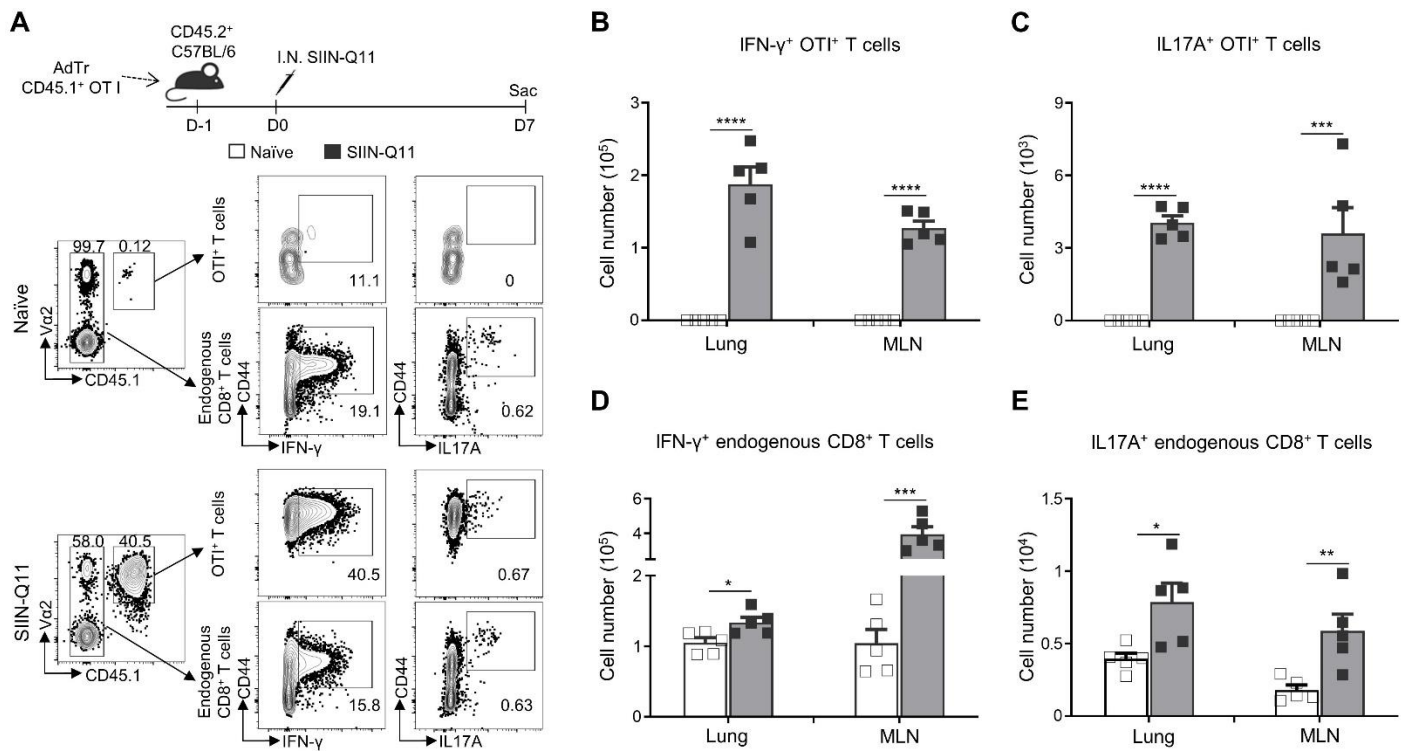

**Fig. S5. Intranasal SIIN-Q11 primes IFN $\gamma$  and IL-17 producing OT-1 and endogenous CD8<sup>+</sup> T cells. Related to Figure 2. (A)** Representative flow cytometry plots displaying IFN $\gamma$ - and IL-17-producing OT-1 and endogenous CD8<sup>+</sup> T cells in lung. Total numbers of IFN $\gamma$  producing OT-1 (**B**) and endogenous CD8<sup>+</sup> T cells (**D**) in lung and draining mediastinal lymph nodes (MLN). Total numbers of IL-17-producing OT-1 (**C**) and endogenous CD8<sup>+</sup> T cells (**E**) from the lung and MLN. Data shown are means  $\pm$  SEM from two independent experiments. \*\*\*\*P < 0.0001, \*\*\*P < 0.001, \*\*P < 0.01 and \*P < 0.05 by two-way ANOVA (B-E).

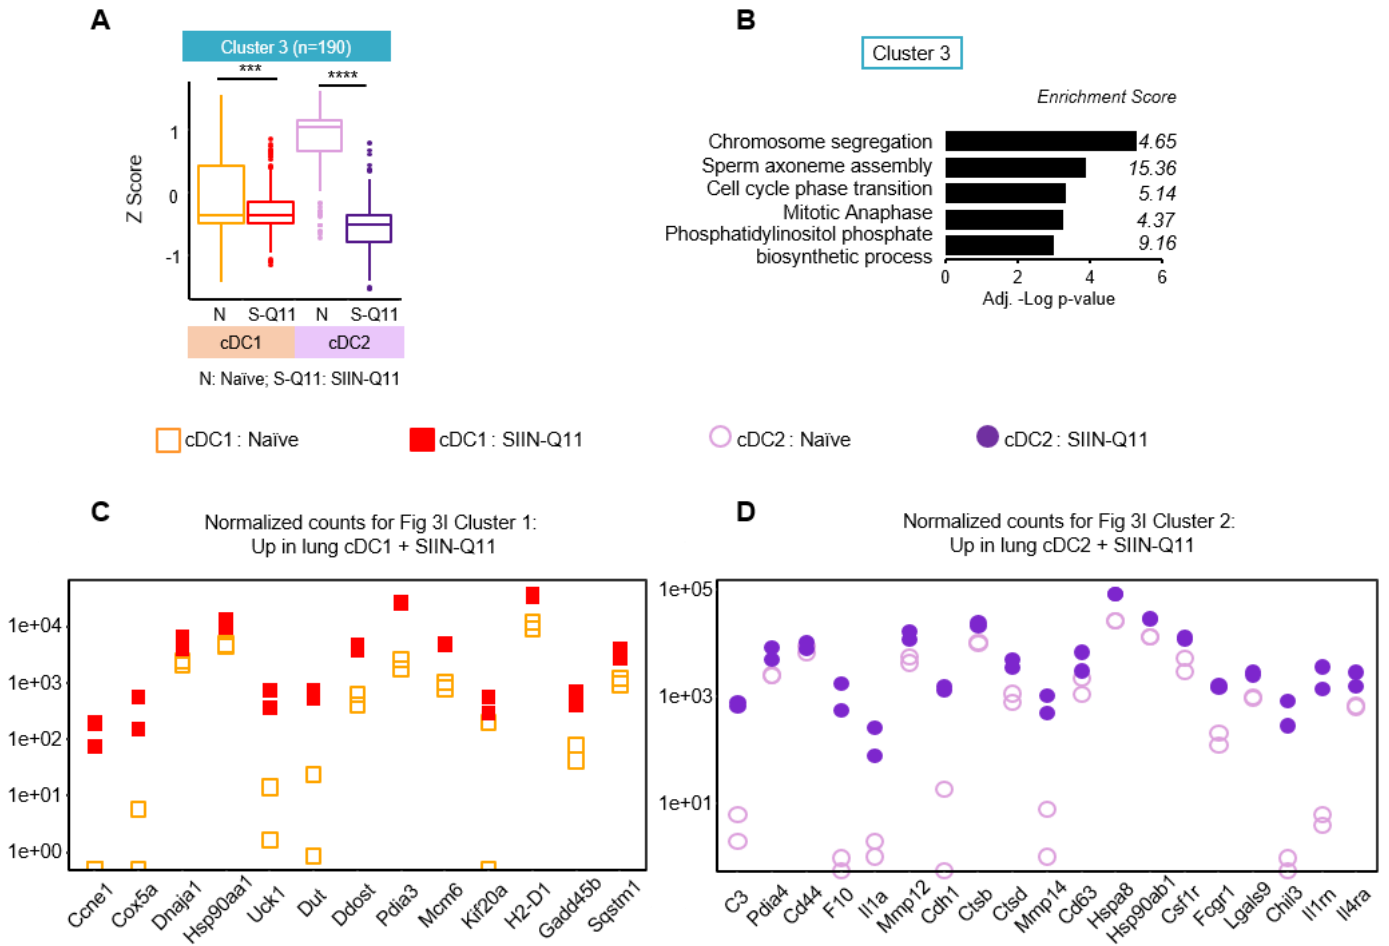

**Fig. S6. Transcriptional analysis of cDC1 and cDC2 lung DCs following intranasal SIIN-Q11 immunization. Related to Figure 3. (A)** Box plots of the Z scores from Cluster 3 DEGs uniquely upregulated at baseline in cDC2 lung DCs, respectively (From Fig 3I). Significant differences in Z scores between the indicated DC groups were assessed by one-way ANOVA. \*P < 0.05, \*\*\*\*P < 0.0001 and ns, not significant. **(B)** Bar charts of Metascape enrichment analysis of DEGs from Clusters 3. **C-D**, Representative differentially expressed genes (DEGs) in lung cDC1 and cDC2 DCs from naïve or SIIN-Q11 immunized mice. Data are presented as normalized counts from Cluster 1 **(C)** and Cluster 2 **(D)** identified in Fig 3I.

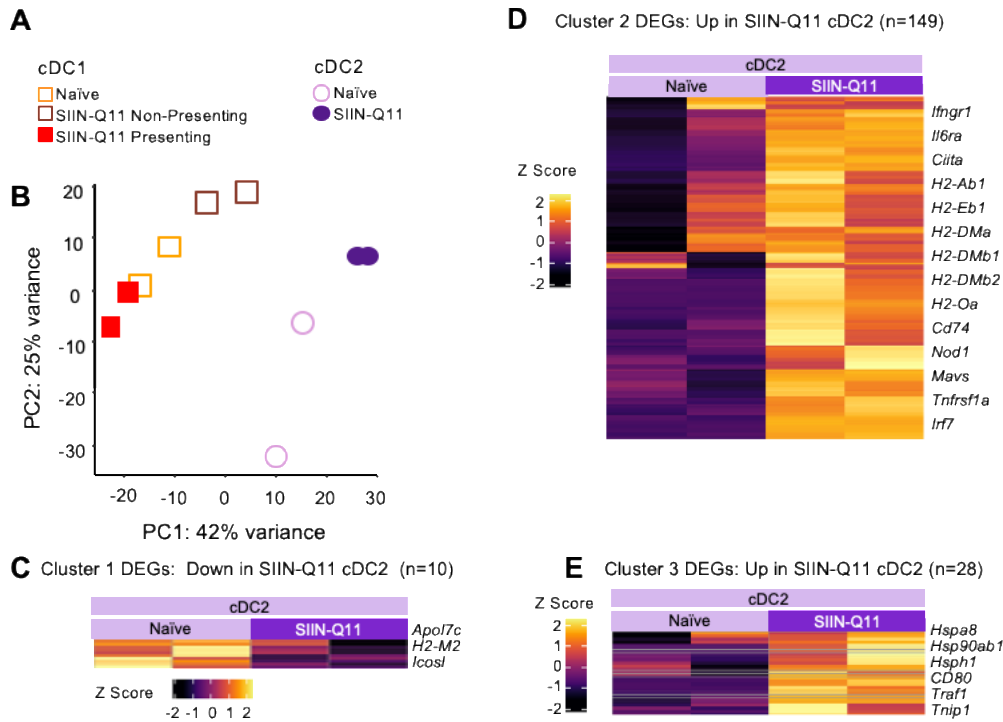

**Fig. S7. Transcriptional analysis of cDC2 from MLN following intranasal SIIN-Q11 immunization. Related to Figure 5.** Flow-sorted cDC2<sup>+</sup>, and SIINFEKL-presenting (S-Q11-P) and non-presenting (S-Q11-N) cDC1<sup>+</sup> DCs were isolated from the MLN of SIIN-Q11 immunized (S-Q11; 48 h post-immunization) or control naïve mice. **(A)** Groups for **B-E**. **(B)** Principal component analysis (PCA) of RNA-seq data from the 5 DC groups. **(C)** Heat map of Cluster 1 DEGs from Fig 5 that were downregulated in both cDC1 and cDC2 by SIIN-Q11. Genes were filtered based on z-scores >0 for naïve and z-scores <0 for the SIIN-Q11 group. **(D)** Heatmap of Cluster 2 DEGs that were upregulated in non-presenting cDC1 and cDC2 by SIIN-Q11. **(E)** Heatmap of Cluster 3 DEGs that were upregulated in antigen-presenting cDC1 and cDC2 by SIIN-Q11. For **(D)** and **(E)**, genes were filtered based on z-scores z >0 for the SIIN-Q11 group.



□ Naïve OT-1      ● OT-1 from WT Lung      ○ OT-1 from Batf3KO Lung

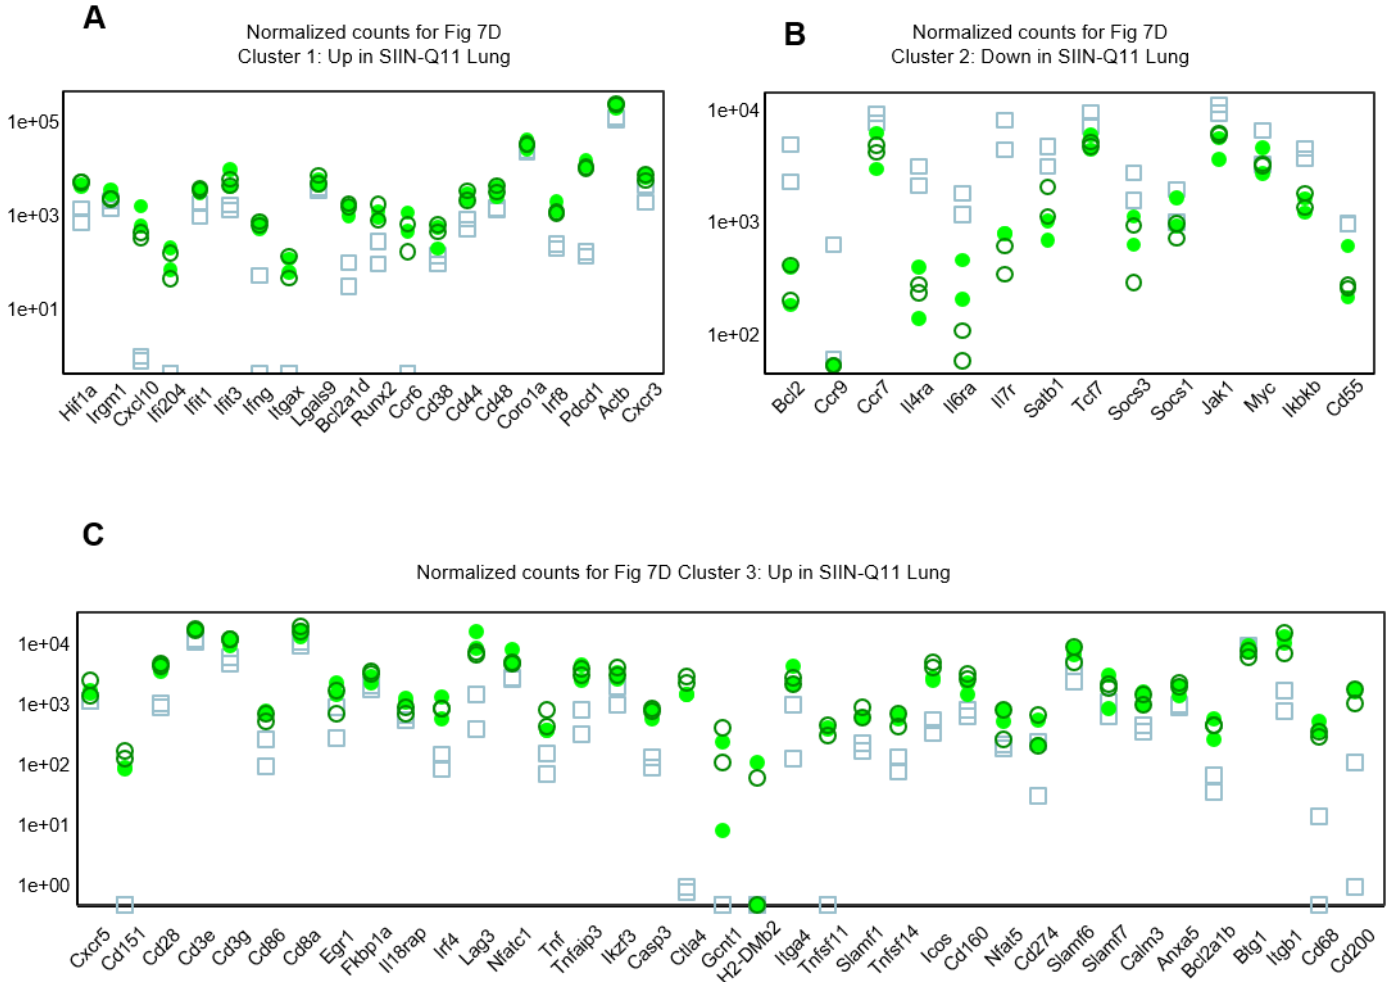

**Fig. S8. Representative DEGs of OT-1 cells harvested from the lungs of naïve or SIIN-Q11 group between WT and Batf3KO mice. Related to Figure 7. Representative DEGs from Cluster 1 up in SIIN-Q11 (A), Cluster 2 down in SIIN-Q11 (B), and Cluster 3 (C) in Fig 7D.**

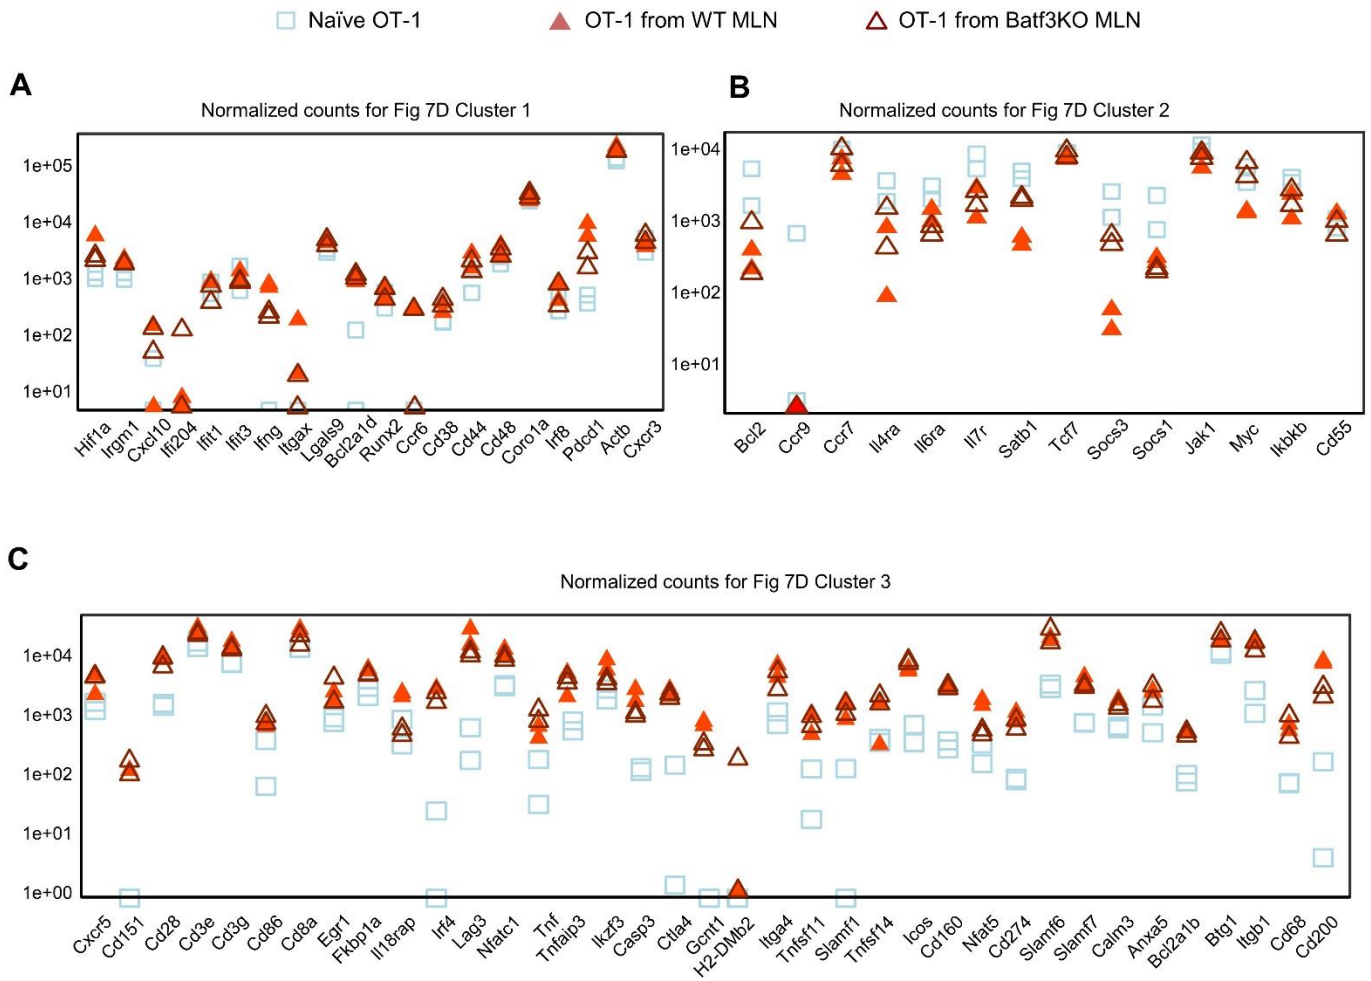

**Fig. S9. Representative DEGs of OT-1 cells harvested from the mediastinal MLNs of naïve or SIIN-Q11 immunized WT and Batf3KO mice. Related to Figure 7. Representative genes from Cluster 1 (A), Cluster 2 (B), and Cluster 3 (C) in Fig 7D.**

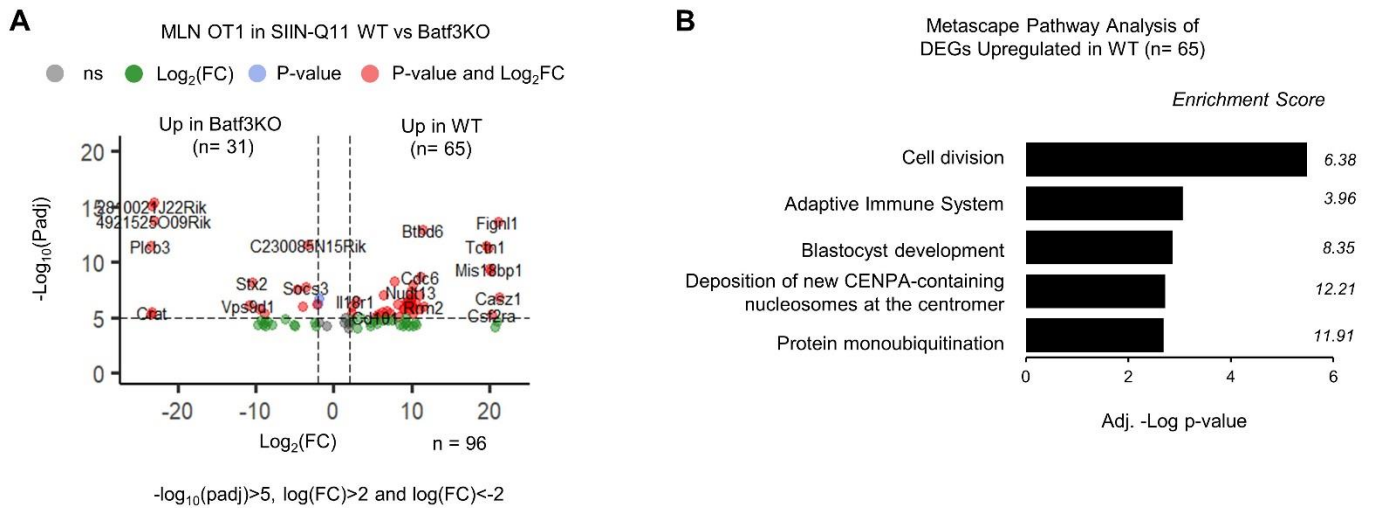

**Fig. S10. DEGs induced in OT-1 cells isolated from mediastinal MLNs of WT or Batf3KO mice. Related to Figure 7. (A)** Volcano plot of DEGs induced in OT-1 cells harvested from draining MLNs of WT and Batf3KO mice. Genes with log fold greater than or less than 2, and with  $-\text{log}_{10}(\text{Padj}) > 1$  are indicated as red. Some of the most significant genes are labeled. **(B)** Pathway enrichment analysis by Metascape of upregulated genes in WT.

**Table S2: list of pathways identified by Metascape analysis**

| <b>Figure #</b>  | <b>Pathway Term</b>    | <b>Description</b>                                               |
|------------------|------------------------|------------------------------------------------------------------|
| <b>Fig. S6B</b>  |                        |                                                                  |
| Cluster 3        | GO:0007059             | Chromosome segregation                                           |
|                  | GO:0007288             | Sperm axoneme assembly                                           |
|                  | GO:0044770             | Cell cycle phase transition                                      |
|                  | Reactome:R-MMU-68882   | Mitotic Anaphase                                                 |
|                  | GO:0046854             | Phosphatidylinositol phosphate biosynthetic process              |
| <b>Fig. S10B</b> |                        |                                                                  |
| Up in WT         | GO:0051301             | Cell division                                                    |
|                  | Reactome:R-MMU-1280218 | Adaptive Immune System                                           |
|                  | GO:0001824             | Blastocyst development                                           |
|                  | Reactome:R-MMU-606279  | Deposition of new CENPA-containing nucleosomes at the centromere |
|                  | GO:0006513             | Protein monoubiquitination                                       |

**Table S3: list of DEGs in MLN cDC2**

| Figure #           | Gene                                                                                                                                                                                                                     |
|--------------------|--------------------------------------------------------------------------------------------------------------------------------------------------------------------------------------------------------------------------|
| <i>Fig. S7C, D</i> |                                                                                                                                                                                                                          |
| Cluster 1          | Apol7c,H2-M2,Ets1,Icosl,Tmem176a,Tti2,Tent5c,Zfp398,2700062C07Rik,Pot1b                                                                                                                                                  |
| Cluster 2          | Slc2a4rg-<br>ps, Surf2, Pdp2, Rin2, Coq8b, Dhx16, Chmp1b2, Hspa8, Hsp90ab1, H1f4, Gstcd, Hsph1, Ipo4, Bc<br>s1l, Vwa5a, P2rx4, Ddit4, Chst14, Ahsa1, Traf1, Scin, Tnip1, Dnajc12, Rab39b, Nuak2, G2e3, Cd8<br>0, Plekha2 |
